# Supplementary material for: Level-Specific Volumetric BMD Threshold Values for the Prediction of Incident Vertebral Fractures Using Opportunistic QCT: A Case-Control Study
Source: Front Endocrinol (Lausanne). 2022 May 20;13:882163. doi: 10.3389/fendo.2022.882163 (PMC9165054; doi:10.3389/fendo.2022.882163)
Supplement: Supplementary file 1 [file DataSheet_1.pdf]

## Supplementary material

|                                        | No incident VF (n=70) | Incident VF (n=35) | No incident VF vs. incident VF | All (n=105) |
|----------------------------------------|-----------------------|--------------------|--------------------------------|-------------|
| Oncologic disease, <i>n</i> (%)        | 70 (100%)             | 26 (74%)           | $p < 0.001$                    | 96 (91%)    |
| Vitamin D therapy, <i>n</i> (%)        | 2 (3%)                | 7 (20%)            | $p = 0.006$                    | 9 (9%)      |
| Antiresorptive therapy, <i>n</i> (%)   | 0 (0%)                | 3 (9%)             | $p = 0.035$                    | 3 (3%)      |
| Chemotherapy, <i>n</i> (%)             | 50 (71%)              | 19 (54%)           | n.s.                           | 69 (66%)    |
| Radiotherapy, <i>n</i> (%)             | 16 (23%)              | 8 (23%)            | n.s.                           | 24 (23%)    |
| Glucocorticoid treatment, <i>n</i> (%) | 10 (14%)              | 6 (17%)            | n.s.                           | 16 (15%)    |
| Diabetes, <i>n</i> (%)                 | 8 (11%)               | 7 (20%)            | n.s.                           | 15 (14%)    |

**Table S1:** Clinical information of patients with and without incident vertebral fracture (VF).

(n.s., not significant). Note: Due to heterogeneous and imperfectly documented patient records, data on pharmacotherapy (Vitamin D, antiresorptive therapy, glucocorticoids) and type 2 diabetes has to be considered with caution.

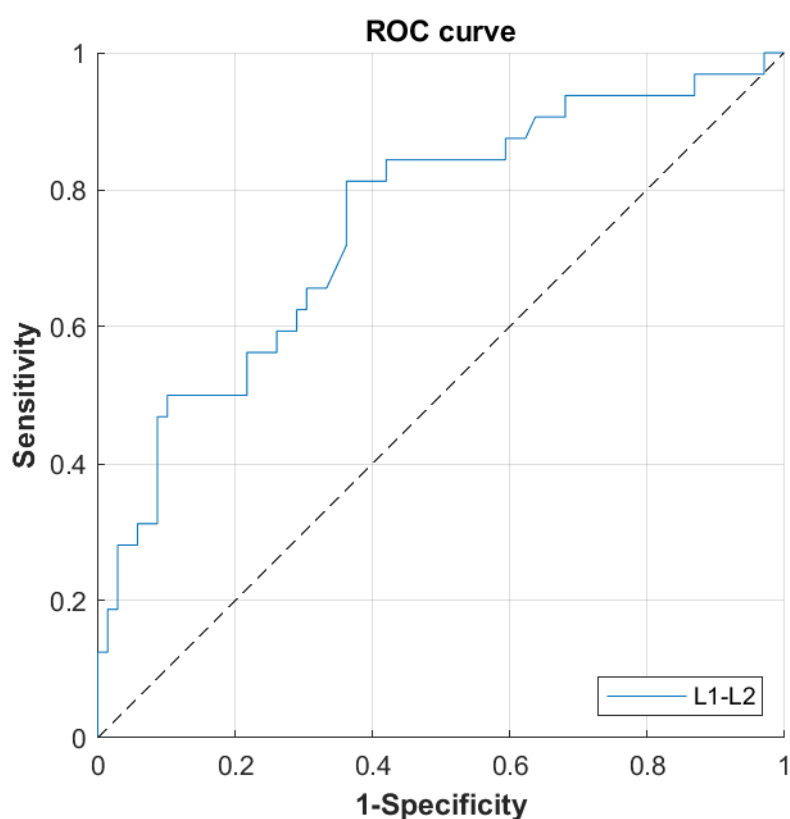

**Figure S1:** ROC curve for the prediction of incident VF by volumetric bone mineral density (vBMD) for L1 – L2. ROC, receiver operating characteristics; VF, vertebral fracture.
